# Supplementary material for: Cross-Recognition of Promoters by the Nine SigB Homologues Present in Streptomyces coelicolor A3(2)
Source: MDPI journal article supplement (doi:10.3390/ijms22157849), 2021-07-22
Supplement: s1 [file s1]

# Supplementary Materials

**International Journal of Molecular Sciences; section: Molecular Microbiology; special issue: Bacterial Regulatory Proteins**

## **Cross-recognition of promoters by the nine SigB homologues present in *Streptomyces coelicolor* A3(2)**

Beatrica Sevcikova, Bronislava Rezuchova, Vladimira Mazurakova, Dagmar Homerova, Renata Novakova, Lubomira Feckova, Jan Kormanec\*

Institute of Molecular Biology, Slovak Academy of Sciences, 845 51 Bratislava, Slovak Republic.

\* Correspondence and reprints: jan.kormanec@savba.sk, Tel.: +421 (2) 59307419,  
ORCID ID: 0000-0003-0377-6413

|                                                                                                          |      |
|----------------------------------------------------------------------------------------------------------|------|
| Table of contents                                                                                        | Page |
| Deletion of the <i>sigB</i> and <i>sigH</i> operons in <i>S. coelicolor</i> A3(2)                        | 2    |
| Figure S1: Physical chromosomal DNA maps of <i>sigB</i> operon and hybridization analysis.               | 3    |
| Figure S2: Phenotypic analysis of <i>S. coelicolor</i> $\Delta sigBop$ and $\Delta sigB$ mutant strains. | 4    |
| Figure S3: Physical chromosomal DNA maps of <i>sigH</i> operon and hybridization analysis.               | 5    |
| Figure S4: Phenotypic analysis of <i>S. coelicolor</i> $\Delta sigHop$ and $\Delta sigH$ mutant strains. | 6    |
| Table S1: Oligonucleotides used in this study.                                                           | 7    |

### ***Deletion of the sigB and sigH operons in S. coelicolor A3(2)***

The entire *rsbB*, *rsbA*, *sigB* operon was deleted by the REDIRECT strategy [41] in wild-type *S. coelicolor* M145 strain. The operon was replaced by the apramycin resistance cassette. The strategy resulted in four independent *S. coelicolor sigBop* mutant clones, which were validated by Southern blot hybridization analysis (Supplementary Figure S1). All four validated *S. coelicolor sigBop* mutant strains had a similar phenotype. The *S. coelicolor sigBop* operon mutant was similar to wild-type *S. coelicolor* M145 strain on both rich and minimal media. In addition, we examined the phenotype under osmotic stress conditions (0.5 M NaCl, 1 M sucrose). The *S. coelicolor sigBop* operon mutant was only partially affected (Supplementary Figure S2). Using a similar REDIRECT strategy, we deleted only the *sigB* gene in *S. coelicolor* M145 (Supplementary Figure S1). However, the phenotype of the *sigB* mutant was similar to the *sigBop* operon mutant. Its spores were only slightly paler (Supplementary Figure S2). However, light microscopy revealed that both mutants produced spore chains comparable to the wild-type *S. coelicolor* M145 strain. The growth of both *S. coelicolor sigB* and *sigBop* mutants in liquid NMP medium was also comparable to the parental *S. coelicolor* M145 strain (data not shown).

Another strategy was used to delete the entire *ushY*, *ushX*, *sigH* operon in wild-type *S. coelicolor* M145 strain. The operon was replaced with an apramycin resistant cassette flanked by a strong *T4* terminator in a suicide plasmid vector to exclude polar expression. The resulting suicide plasmid pSigHdel3 was used to replace the *ushY*, *ushX*, *sigH* operon in wild-type *S. coelicolor* M145 strain by homologous recombination. This strategy resulted in a single mutant *S. coelicolor sigHop* strain, which was validated by Southern blot hybridization analysis (Supplementary Figure S3). The *S. coelicolor sigHop* mutant was phenotypically similar to wild-type *S. coelicolor* M145 strain on rich and minimal solid media. In addition, we examined the phenotype under osmotic stress conditions, and the *S. coelicolor sigHop* operon mutant was also similar to wild-type *S. coelicolor* M145 strain (Supplementary Figure S4). The growth of the *S. coelicolor sigHop* mutant in liquid NMP medium was comparable to the parental *S. coelicolor* M145 strain. In addition, light microscopy revealed that the mutant produced spore chains comparable to the wild-type *S. coelicolor* M145 strain (data not shown).

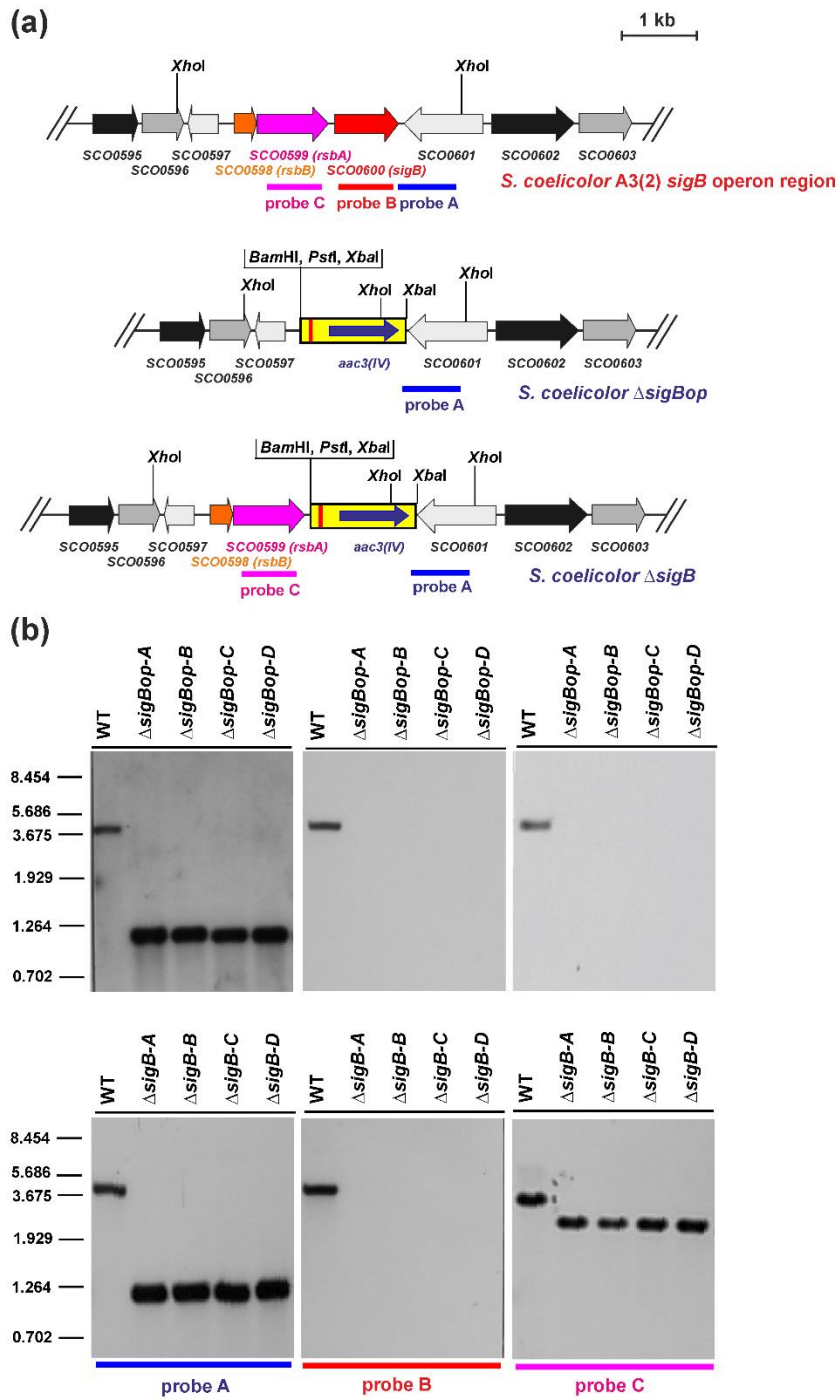

**Figure S1.** (a) Physical chromosomal DNA maps comprising the wild-type *sigB* operon region of *S. coelicolor* M145 and the disrupted alleles of the *sigB* operon and the *sigB* gene in *S. coelicolor*  $\Delta$ *sigBop* and *S. coelicolor*  $\Delta$ *sigB*, respectively. The bars below the maps represent the probes used for Southern hybridization analysis. Relevant restriction sites are indicated. (b) Southern blot hybridization analysis of chromosomal DNA from four independently obtained *S. coelicolor*  $\Delta$ *sigBop* and *S. coelicolor*  $\Delta$ *sigB* clones and wild-type *S. coelicolor* M145 (WT) as reference. 1  $\mu$ g of DNA from the corresponding strain was digested with the restriction endonuclease *Xho*I, separated by electrophoresis in a 0.8% (w/v) agarose gel, and transferred to a Hybond N membrane (Roche) as described in [49]. Hybridization was performed according to the standard DIG protocol (Roche) using DIG-labelled probes. Lambda DNA-*Bst*EII digest was used as a size standard.

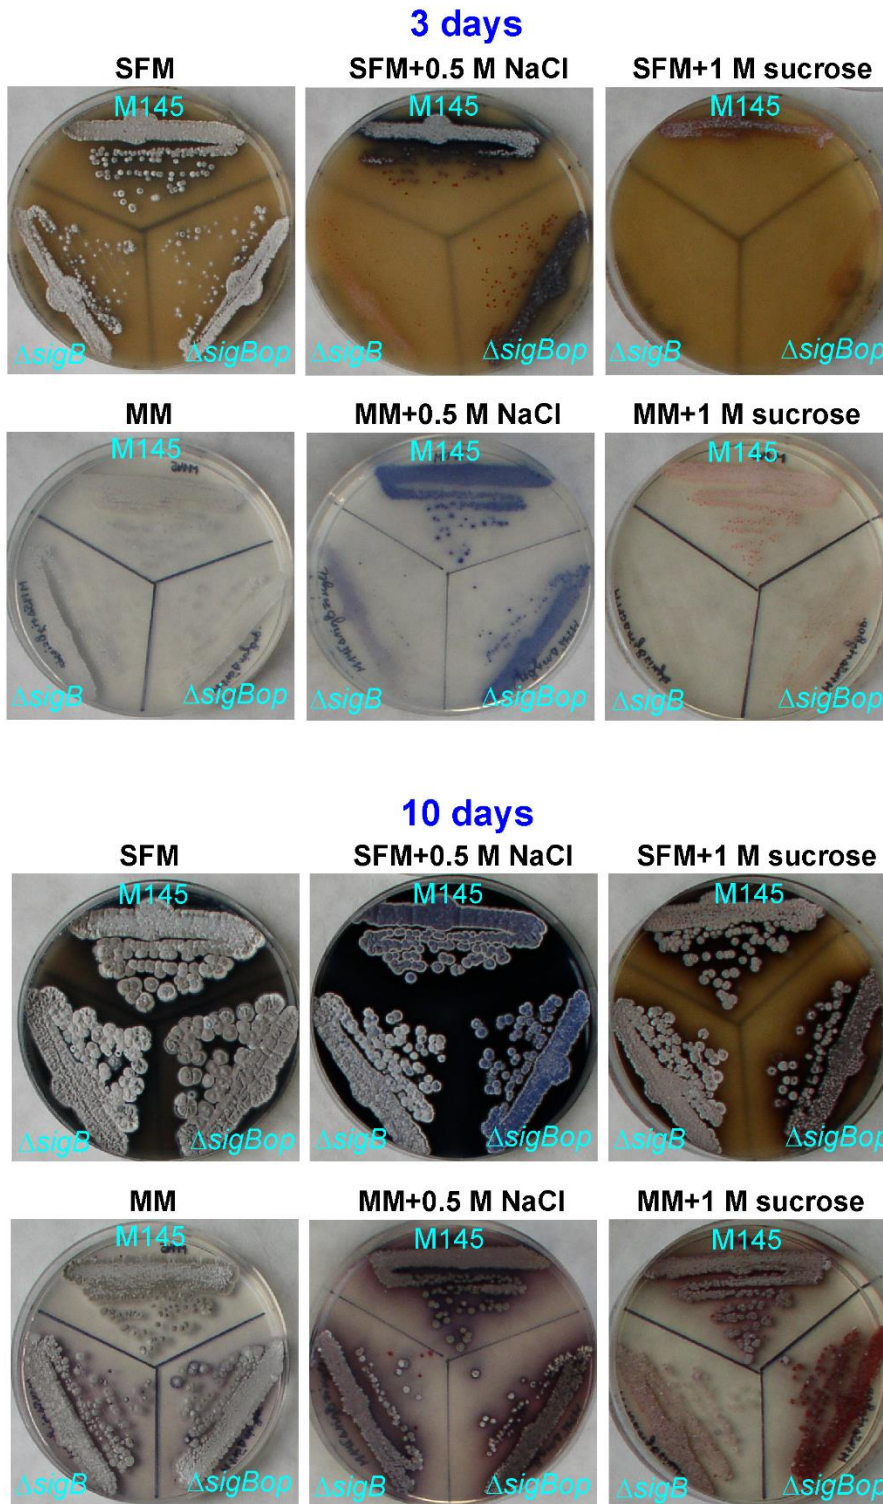

**Figure S2.** Phenotypic analysis of *S. coelicolor*  $\Delta sigBop$  and *S. coelicolor*  $\Delta sigB$  mutant strains. Spores of the wild-type *S. coelicolor* M145, *S. coelicolor*  $\Delta sigBop$  and *S. coelicolor*  $\Delta sigB$  mutants were spread on the solid rich SFM medium, minimal MM medium containing 0.5% mannitol, both media with 0.5 M NaCl or 1 M sucrose and grown for 3 and 10 days at 28 °C.

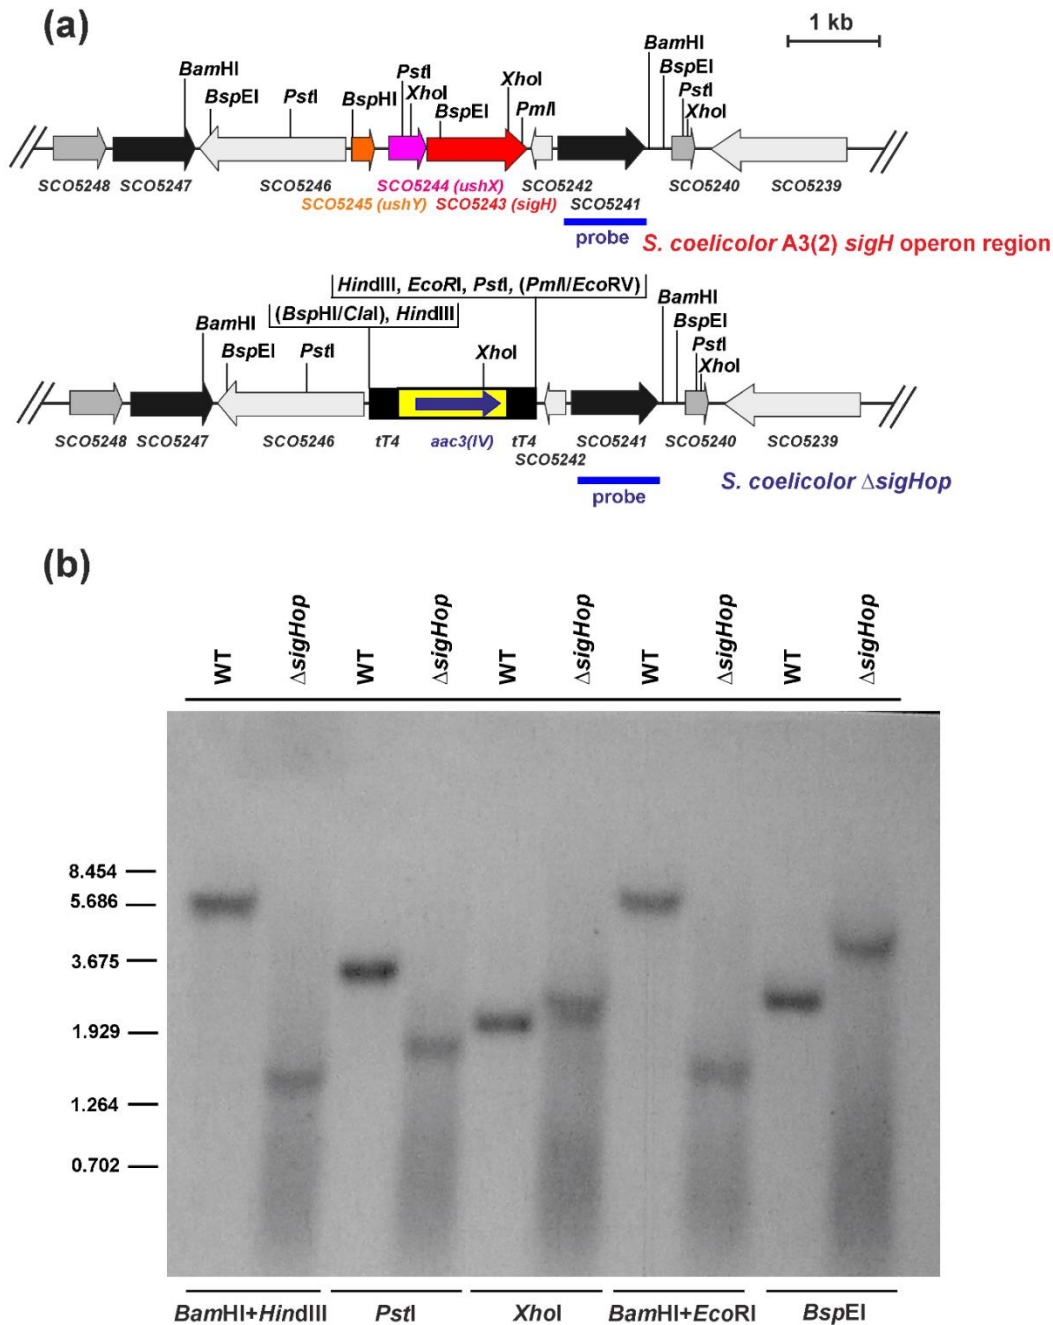

**Figure S3. (a)** Physical chromosomal DNA maps comprising the wild-type *sigH* operon region of *S. coelicolor* M145 and the disrupted allele of the *sigH* operon in *S. coelicolor*  $\Delta$ *sigHop*. The bar below the maps represents the probe used for Southern hybridization analysis. Relevant restriction sites are indicated. **(b)** Southern blot hybridization analysis of chromosomal DNA from *S. coelicolor*  $\Delta$ *sigHop* and wild-type *S. coelicolor* M145 (WT) as reference. 1  $\mu$ g of DNA from the corresponding strain was digested with the indicated restriction enzymes, separated by electrophoresis in a 0.8% (w/v) agarose gel, and transferred to a Hybond N membrane (Roche) as described in [49]. Hybridization was performed according to the standard DIG protocol (Roche) using DIG-labelled probe. Lambda DNA-*Bst*EII digest was used as a size standard.



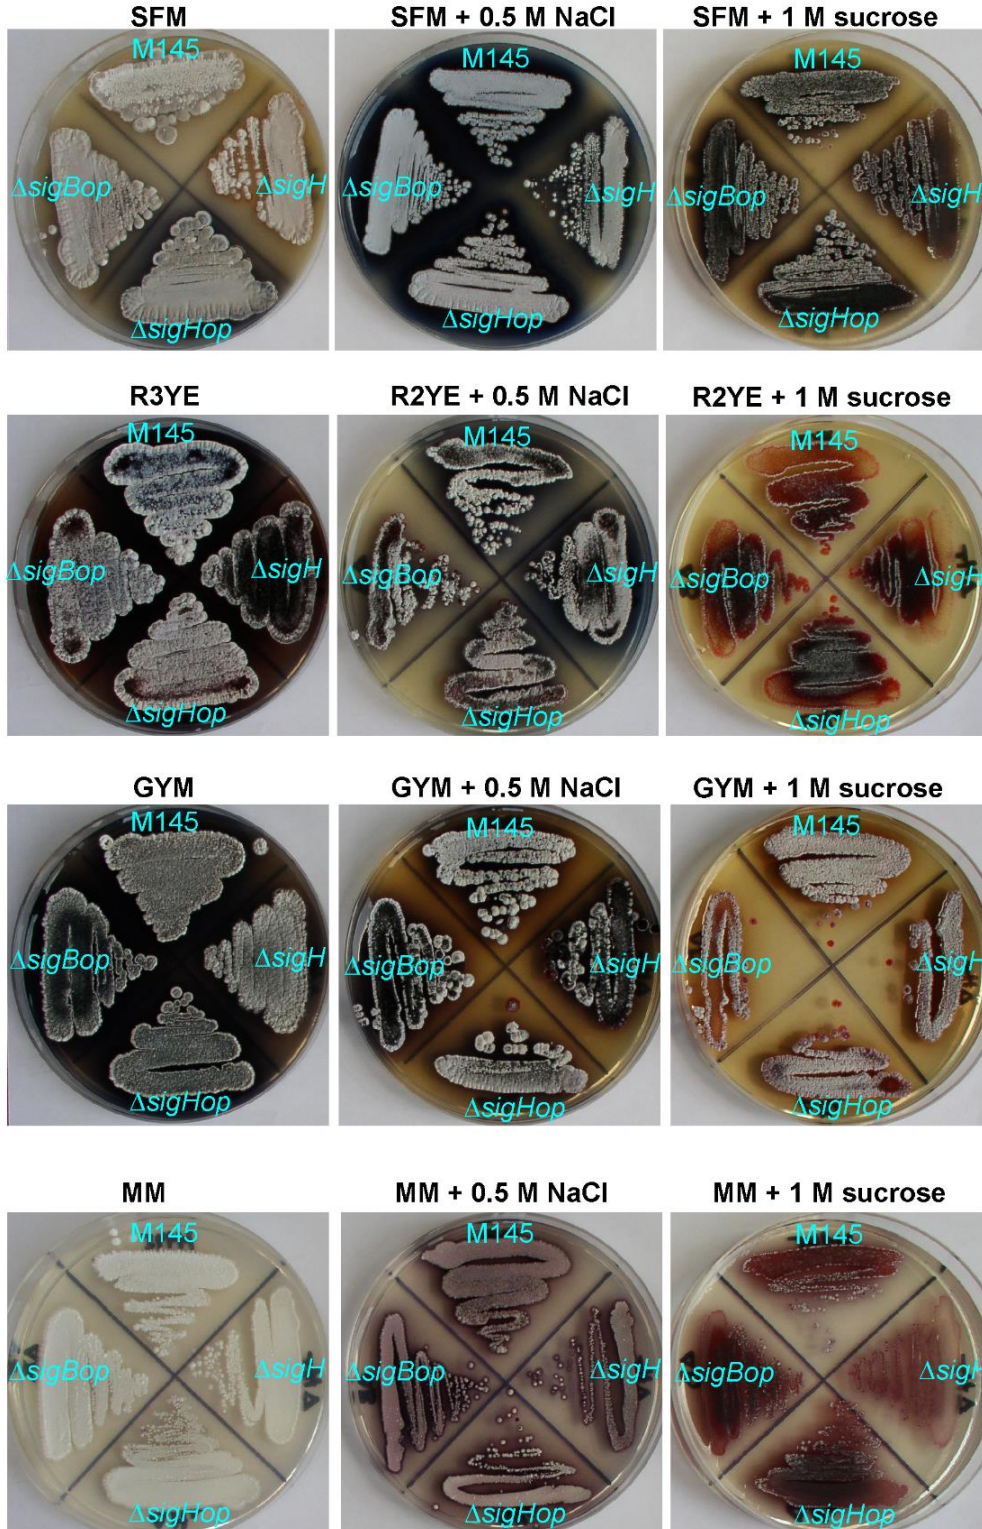

**Figure S4.** Phenotypic analysis of *S. coelicolor*  $\Delta sigHop$  mutant strain. Spores of the wild-type *S. coelicolor* M145, *S. coelicolor*  $\Delta sigHop$ , *S. coelicolor*  $\Delta sigBop$ , *S. coelicolor*  $\Delta sigH$  [27] prepared in M145 genetic background were spread on the solid rich SFM, R2YE and GYM media and minimal MM medium containing 0.5% mannitol and grown for 10 days at 28 °C. In addition, the same amount of spores was spread on similar media containing 0.5 M NaCl or 1 M sucrose.

**Table S1.** Oligonucleotides used in this study. Cloning sites are underlined.

| Oligonucleotide | Sequence (5' – 3')                                              |
|-----------------|-----------------------------------------------------------------|
| SigBNde         | GGGGCATATGCCGGAGATCGCGGACCCGTCC                                 |
| SigBHind        | GGGA <u>AAGCTT</u> CAGGTGGTGCTGAGCATGCCTTCC                     |
| SigF2Nde        | GGGG <u>CATATG</u> AGCCGGGGCGCCGACACCCGGGC                      |
| SigF2Hind       | GGGA <u>AAGCTT</u> ATGCGTCGATCCGGTTCGCGG                        |
| SigH2Nde        | GGGG <u>CATATG</u> CGGGACGAAGAGCGCGGTACACG                      |
| SigH2Hind       | GGGA <u>AAGCTT</u> ACTCCTCGACGAGCAGCTTCTCC                      |
| SigINde         | GGGG <u>CATATG</u> TACCCCGGCTCGACGGATCG                         |
| SigIHind        | GGGA <u>AAGCTT</u> ATCACTCCTCGACCGTGAGCCCC                      |
| SigKNde         | GGGG <u>CATATG</u> CCGATCCACGCCAGCGTGAAGC                       |
| SigKHind        | GGGA <u>AAGCTT</u> CACGCCTGCGGACCCGGATCCC                       |
| SigLNde         | GGGGCATATGCAGACCGCCGTGGTCCGTCCGC                                |
| SigLHind        | GGGA <u>AAGCTT</u> CAGGCGCAGCCGAGTTCGCCCAGC                     |
| SigMNde         | GGGG <u>CATATG</u> CTCATAGAAACGCCACCATCC                        |
| SigMHind        | GGGA <u>AAGCTT</u> CACCTGCTGTGTCCCCTGTGATCC                     |
| SigNNde         | GGGG <u>CATATG</u> TCCGCAGAACAGGGCAGCTCG                        |
| SigNHind        | GGGA <u>AAGCTT</u> CAGTCGGAGATGAGACCCTCGC                       |
| -47             | CGCCAGGGTTTTCCCAAGTCACGAC                                       |
| Mut80           | GGGTTCGCGCACATTTCCCCG                                           |
| SCO0566r        | GGTCCTGCTCCGCCTCCCGTACC                                         |
| SCO2512r        | AGTGAGGGCAGAACAATTCCTGC                                         |
| SCO1089r        | CCACCACCCTGCTTGCCGGAGG                                          |
| rrnEr           | CCACGAGAGCGGAACAGCCG                                            |
| SCO0775r        | GGTGTCCATCAGCGTCGTGCCC                                          |
| SCO0279r        | GCGGCACCACCTGGTCGAAAAGG                                         |
| SCO5998r        | CGATCCGGGCGATCATCTCAAGG                                         |
| SCO3557r        | GAATGCCGCAGAGCAGTCCGGTCG                                        |
| SCO7446r        | CCAGAAACCGCCGGGCCAGTTC                                          |
| SCO6509r        | GCCACAGGACCAGAACCGCC                                            |
| SCO1566r        | CGAGCACTGCCTTGATGAACAC                                          |
| SCO2315r        | GGACGAACCGCACCAGGTCG                                            |
| SCO6014r        | CGCCGACAGGGATTTCTTGAG                                           |
| SCO5749r        | CCTCCAGCGCAAGCAGATTCTCC                                         |
| SigBopDir       | GCCGGCGTATGCCCGGCGAAGTTCCGAAGGGGA<br>TCGAGTATTCCGGGGATCCGTCGACC |
| SigBopRev       | GAAGAAGACGACGACCGCGGCCTGAGACCCGAG<br>CCCCGCTGTAGGCTGGAGCTGCTTC  |
| SigBDir         | GTGACAACGACGACCGATCCACCGGGAGGGCAC<br>ATCATGATTCCGGGGATCCGTCGACC |
